# Supplementary material for: High resolution structure of an M23 peptidase with a substrate analogue
Source: PubMed Central journal article supplement (PMC4594094; doi:10.1038/srep14833), 2015-10-06

## Supplementary material for:

### High resolution structure of an M23 peptidase with a substrate analogue

Maja Grabowska<sup>1</sup>, Elzbieta Jagielska<sup>1</sup>, Honorata Czapinska<sup>1,2</sup>, Matthias Bochtler<sup>1,2\*</sup>, and Izabela Sabala<sup>1\*</sup>

<sup>1</sup>International Institute of Molecular and Cell Biology, Ks. Trojdena 4, 02-109 Warsaw, Poland

<sup>2</sup>Institute of Biochemistry and Biophysics, Pawinskiego 5a, 02-109 Warsaw, Poland

\*Corresponding coauthors:

Izabela Sabala      e-mail: [izabela@iimcb.gov.pl](mailto:izabela@iimcb.gov.pl)

Matthias Bochtler      e-mail: [mbochtler@iimcb.gov.pl](mailto:mbochtler@iimcb.gov.pl)

**Supplementary Table 1. Data collection and refinement statistics.**

| Data collection statistics                               |                           |
|----------------------------------------------------------|---------------------------|
| Space group                                              | $P2_1$                    |
| Cell dimensions                                          |                           |
| $a$ (Å)                                                  | 32.0                      |
| $b$ (Å)                                                  | 101.6                     |
| $c$ (Å)                                                  | 77.8                      |
| $\beta$ (°)                                              | 91.5                      |
| Beamline                                                 | BESSY 14.1                |
| Wavelength (Å)                                           | 0.917                     |
| Resolution (Å)                                           | 40-1.45                   |
| lowest shell                                             | 40-4.32                   |
| highest shell                                            | 1.54-1.45                 |
| $R_{\text{sym}}$ (%) <sup>*</sup>                        | 11.2 (3.9, 64.9)          |
| $R_{\text{meas}}$ (%) <sup>*</sup>                       | 12.1 (4.2, 70.6)          |
| $CC_{1/2}$ <sup>*</sup>                                  | 99.8 (99.9, 81.3)         |
| $I/\sigma I$ <sup>*</sup>                                | 12.0 (39.5, 2.5)          |
| Completeness (%) <sup>*</sup>                            | 99.7 (99.9, 98.1)         |
| Multiplicity <sup>*</sup>                                | 6.8 (6.9, 6.5)            |
| $V_M$                                                    | 2.2                       |
| Solvent content (%)                                      | 44                        |
| Refinement statistics                                    |                           |
| No. reflections                                          | 87615                     |
| $R_{\text{work}}/R_{\text{free}}$                        | 14.9 / 18.5               |
| No. atoms <sup>**</sup> (average B<br>[Å <sup>2</sup> ]) | 5713 (15.5)               |
| Protein                                                  | 4678 (13.1)               |
| Tetraglycine phosphinate                                 | 87 (22.1 <sup>***</sup> ) |
| Other                                                    | 948 (27.1)                |
| R.m.s deviations                                         |                           |
| Bond lengths (Å)                                         | 0.006                     |
| Bond angles (°)                                          | 1.1                       |
| Ramachandran                                             |                           |
| allowed region (%)                                       | 100.0                     |
| favored region (%)                                       | 97.8                      |
| Molprobit clashscore                                     | 1.2                       |

\* Lowest and highest shell in brackets

\*\* Alternative conformations counted separately.

\*\*\* Tetraglycine phosphinate B-factors correspond to the average values for alternative conformations refined separately with full occupancy.

**Supplementary Figure 1. Binding mode of tetraglycine phosphinate to the active site cleft of LytM.**

(A) Overall structure of the superposed four LytM-phosphinate molecules present in the asymmetric unit. The protein, transition state analogue and the zinc ion are colored according to their B-factors, from blue ( $<5 \text{ \AA}^2$ ) to red ( $>50 \text{ \AA}^2$ ). (B) LytM active site showing all observed conformations of the analogue and binding cleft lining loops. (C) The positions of the CB atoms have been modelled for the well defined P1' and P2' residues of the tetraglycine phosphinate. Potential contacts/steric clashes with the protein residues and waters that would be displaced by alanines instead of glycines are marked by dotted lines (assuming a  $3.5 \text{ \AA}$  distance cutoff).

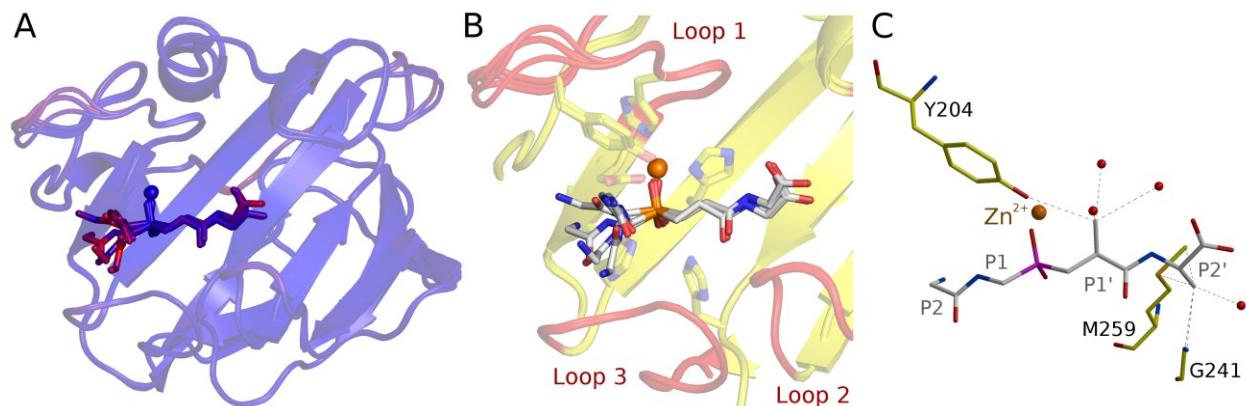

Supplement: srep14833-s1.pdf [file srep14833-s1.pdf]
